# Supplementary material for: Prediction of high and low disease activity in early MS patients using multiple kernel learning identifies importance of lateral ventricle intensity
Source: PubMed Central journal article supplement — Mult Scler J Exp Transl Clin. 2022 Jul 3;8(3):20552173221109770. doi: 10.1177/20552173221109770 (PMC9260586; doi:10.1177/20552173221109770), 2022-07-03
Supplement: sj-pdf-6-mso-10.1177_20552173221109770.pdf [file sj-pdf-6-mso-10.1177_20552173221109770.pdf]

## MS Journal Appendix for MRI methodology

| Hardware                          |         |
|-----------------------------------|---------|
| Field strength                    | 3 Tesla |
| Manufacturer                      | Siemens |
| Model                             | TimTrio |
| Coil type<br>(e.g. head, surface) | Head    |
| Number of coil channels           | 32      |

| Acquisition sequence                                              |                                                                                                                                                       |
|-------------------------------------------------------------------|-------------------------------------------------------------------------------------------------------------------------------------------------------|
| Type<br>(e.g. FLAIR, DIR, DTI, fMRI)                              | MPRAGE, FLAIR                                                                                                                                         |
| Acquisition time                                                  | MPRAGE: 4:24 min; FLAIR: 7:38 min                                                                                                                     |
| Orientation                                                       | HFS                                                                                                                                                   |
| Alignment<br>(e.g. anterior commissure/posterior commissure line) | anterior to posterior commissure line                                                                                                                 |
| Voxel size                                                        | MPRAGE & FLAIR: 1mm isotropic                                                                                                                         |
| TR                                                                | MPRAGE: 1900 ms; FLAIR: 6000 ms                                                                                                                       |
| TE                                                                | MPRAGE: 3.03 ms; FLAIR: 388 ms                                                                                                                        |
| TI                                                                | MPRAGE: 900 ms; FLAIR: 2100 ms                                                                                                                        |
| Flip angle                                                        | MPRAGE: 9°; FLAIR: 120°                                                                                                                               |
| NEX                                                               | MPRAGE & FLAIR: 1                                                                                                                                     |
| Field of view                                                     | MPRAGE & FLAIR: 256x256x176                                                                                                                           |
| Matrix size                                                       | MPRAGE & FLAIR: 256x256                                                                                                                               |
| Parallel imaging                                                  | Yes <span style="margin-left: 100px;"><input type="checkbox"/></span> <span style="margin-left: 100px;"><input checked="" type="checkbox"/> No</span> |
| If used, parallel imaging method:<br>(e.g. SENSE, GRAPPA)         |                                                                                                                                                       |
| Cardiac gating                                                    | Yes <span style="margin-left: 100px;"><input type="checkbox"/></span> <span style="margin-left: 100px;"><input checked="" type="checkbox"/> No</span> |
| If used, cardiac gating method:<br>(e.g. PPU or ECG)              |                                                                                                                                                       |
| Contrast enhancement                                              | <input checked="" type="checkbox"/> Yes <span style="margin-left: 100px;"><input type="checkbox"/> No</span>                                          |

**Acquisition sequence**

If used, provide name of contrast agent, dose and timing of scan post-contrast administration

Gadovist, 0.1mL (1mmol/mL) per kg body weight, second MPAGE 10min. post-contrast administration

Other parameters:

| <b>Image analysis methods and outputs</b>                                                                                                      |                                                                                      |
|------------------------------------------------------------------------------------------------------------------------------------------------|--------------------------------------------------------------------------------------|
| <b>Lesions</b>                                                                                                                                 |                                                                                      |
| Type<br>(e.g. Gd-enhancing, T2-hyperintense, T1-hypointense)                                                                                   | T2-hyperintense, Gd-enhancing (when available)                                       |
| Analysis method                                                                                                                                | Lesion count and volume                                                              |
| Analysis software                                                                                                                              | ITK-SNAP, FSL cluster                                                                |
| Output measure<br>(e.g. count or volume [ml])                                                                                                  | Count and volume (mL)                                                                |
| <b>Tissue volumes</b>                                                                                                                          |                                                                                      |
| Type<br>(e.g. whole brain, grey matter, white matter, spinal cord)                                                                             | Whole brain, grey and white matter and CSF                                           |
| Analysis method                                                                                                                                | Whole brain, grey and white matter and CSF volume                                    |
| Analysis software                                                                                                                              | FSL SIENA-X (without BET)                                                            |
| Output measure<br>(e.g. absolute tissue volume in ml, tissue volume as a fraction of intracranial volume, percentage change in tissue volumes) | Absolute tissue volume in mL and VScaling factor (as a representative for head-size) |
| <b>Tissue measures (e.g. MTR, DTI, T1-RT, T2-RT, T2*, T2', <sup>1</sup>H-MRS, perfusion, Na)</b>                                               |                                                                                      |
| Type<br>(e.g. whole brain, grey matter, white matter, spinal cord, normal-appearing grey matter or white matter)                               |                                                                                      |
| Analysis method                                                                                                                                |                                                                                      |
| Analysis software                                                                                                                              |                                                                                      |
| Output measure                                                                                                                                 |                                                                                      |
| <b>Other MRI measures (e.g. functional MRI)</b>                                                                                                |                                                                                      |
| Type<br>(e.g. whole brain, grey matter, white matter, spinal cord, normal-appearing grey matter or white matter)                               |                                                                                      |
| Analysis method                                                                                                                                |                                                                                      |
| Analysis software                                                                                                                              |                                                                                      |
| Output measure                                                                                                                                 |                                                                                      |

#### Other analysis details:

FLAIR MRIs were centred on the choroid plexus in the lateral ventricles and cropped using an in-house Python script, mean intensities calculated and flattened into a 1D array with numpy and matplotlib libraries.
